# Supplementary material for: Oxidation Enhances Human Serum Albumin Thermal Stability and Changes the Routes of Amyloid Fibril Formation
Source: PLOS journal article supplement (doi:10.1371/journal.pone.0084552), 2014-01-08
Supplement: S1 (10.1371/journal.pone.0084552.s001) [file journal.pone.0084552.s001]

## Supplementary Materials

### Oxidation Enhances Human Serum Albumin Thermal Stability and Changes the Routes of Amyloid Fibril Formation.

Giuseppe Sancataldo, Valeria Vetri, Vito Foderà, Gianluca Di Cara, Valeria Militello and Maurizio Leone.

**Figure S1**

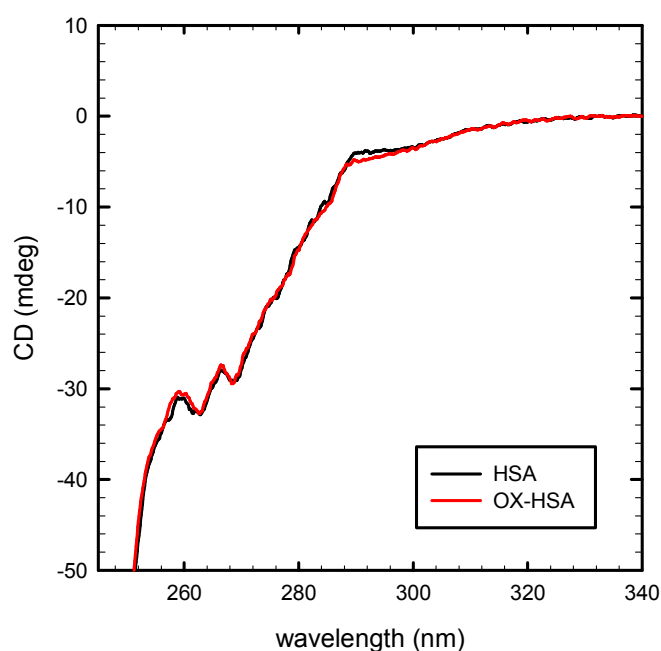

**Figure S1. Near UV CD spectra of HSA (black) and OX-HSA (red).** Spectra show two minima at 262 nm and 268 nm and a shoulder at 292 nm characteristic of aromatic chromophores and disulphide bonds. No significative variations are observed in native and oxidized sample suggesting no appreciable variation in the asymmetry of aromatic residues environment.

**Figure S2**

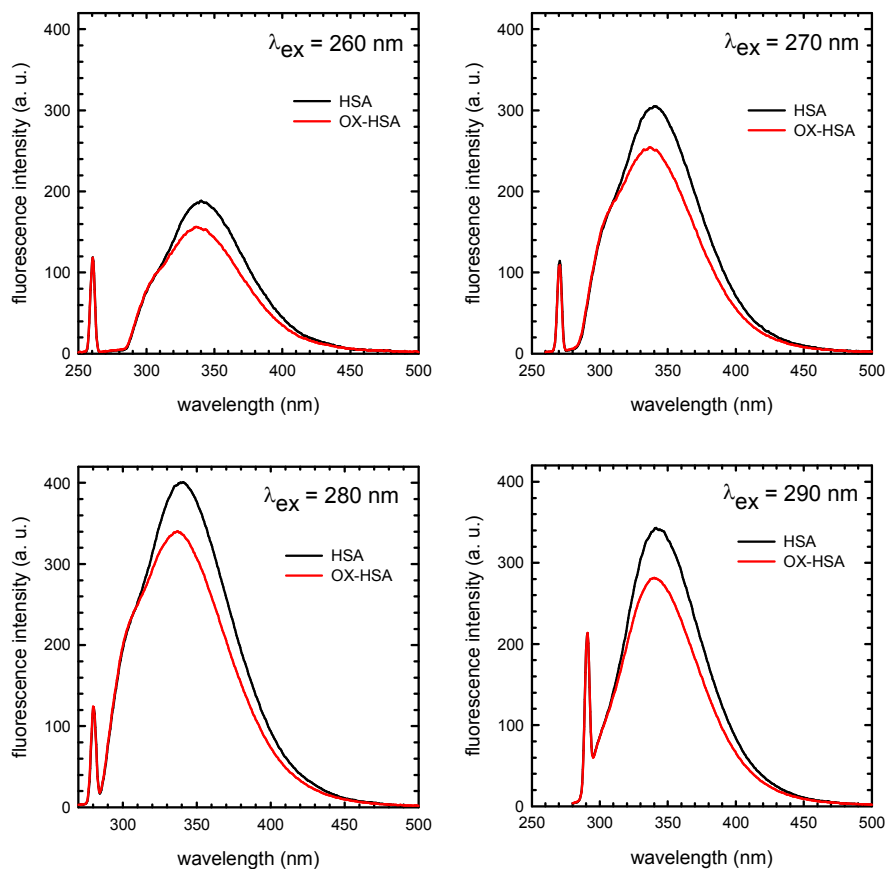

**Figure S2. Intrinsic emission spectra of HSA (black) and OX-HSA (red) at different excitation wavelengths.** Emission spectra, attributable to tyrosine and tryptophan, show a reduced quantum yield for OX-HSA sample. Emission spectrum excited at  $\lambda_{\text{ex}} = 290 \text{ nm}$  does not show the shoulder observable in other spectra at about 310 nm due to the contribution of tyrosine, furthermore this spectrum shows a blue shift of the emission band in OX-HSA suggesting a more hydrophobic environment for tryptophan in oxidized sample.

**Figure S3**

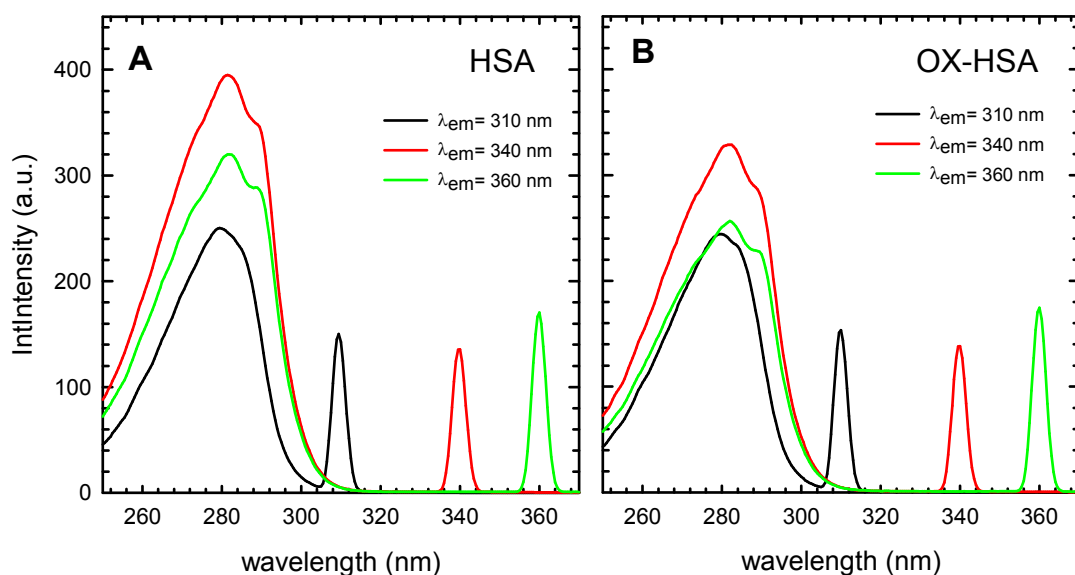

**Figure S3. Intrinsic excitation spectra of HSA (A) and OX-HSA (B).** In emission spectrum at  $\lambda_{em}=310$  nm (black), where absorption contribution of tyrosines is prevalent, no significant variation is observed in OX-HSA and HSA sample. At longer wavelengths, where the contribution of the tryptophan is predominant, OX-HSA sample presents an excitation spectrum which, although similar in form, is characterized by a lower intensity compared to HSA sample. This is particularly evident in the excitation spectra measured at emission wavelength of  $\lambda_{em}=360$  nm (green). This result suggests a significant variation in the tryptophan surrounding environment due to oxidation.

**Figure S4**

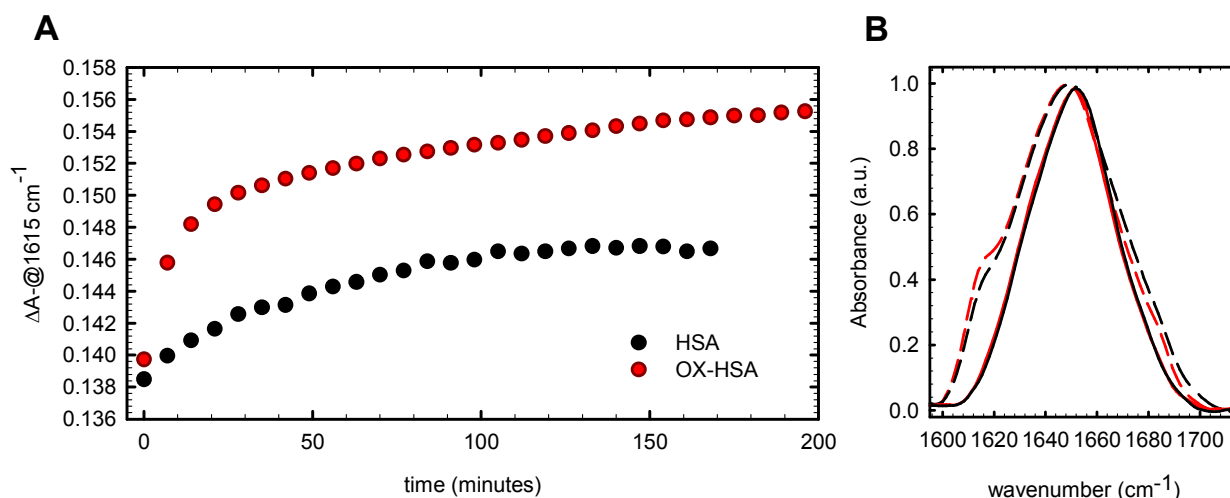

**Figure S4. Analysis of high concentration samples in the Amide I region.** (A) Temporal evolution of absorbance at 1615 cm<sup>-1</sup> during aggregation Kinetics at 70 °C of 10 mg/ml HSA (black dots) and OX-HSA (red dots). (B) Normalized absorption spectra of freshly prepared samples HSA (black solid line), OX-HSA (red solid line) and of samples after incubation at 70°C for 200 min HSA aggregates (black dashed line) and OX-HSA aggregates (red dashed line). As can be seen the temporal evolution of absorbance at 1615 cm<sup>-1</sup> is different being variations in OX-HSA sample of larger extent. The shape of aggregates samples presents the typical peak around 1615 cm<sup>-1</sup> of parallel intermolecular  $\beta$ -sheets and shoulder at 1680 cm<sup>-1</sup> assigned to antiparallel  $\beta$ -sheets. The ratio between these signals is different in the two samples clearly indicating that the two aggregates are different at secondary structure level. These measurements are in line with what found at lower concentration in CD experiments.

**Figure S5**

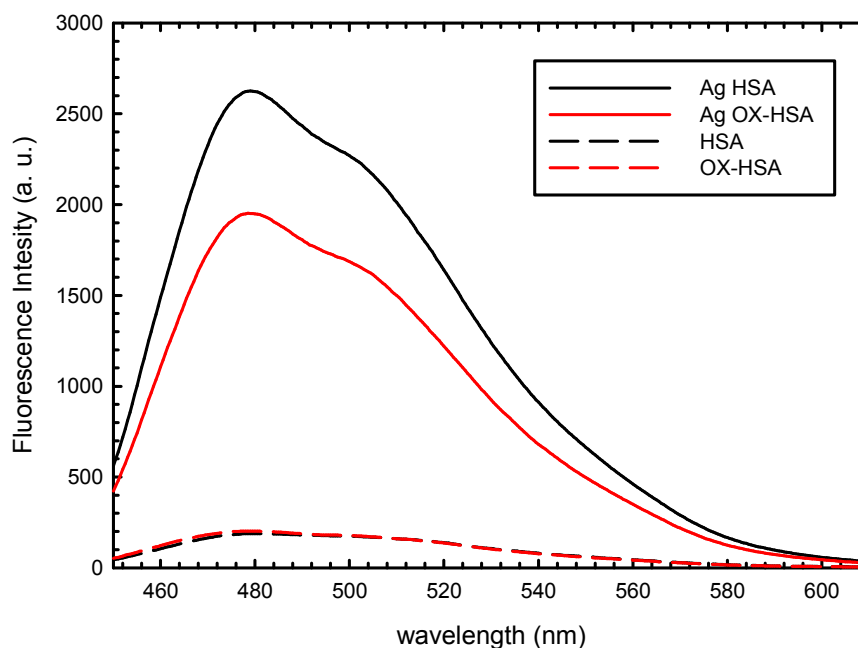

**Figure S5. Thioflavin T emission spectra.** Room Temperature *ex situ* ThT Emission spectra of native HSA (dashed black line), OX-HSA (dashed red line), HSA aggregates (solid black line) and OX-HSA aggregates (solid red line). Measurements were performed in protein 0.5 mg/ml (7  $\mu$ M) and ThT40  $\mu$ M concentration in K-phosphate buffer at pH 7.4 for freshly prepared sample and sample after incubation at 70°C for 12h. OX-HSA sample shows a lower Tht intensity suggesting a less amyloid-like nature for the OX-HSA aggregates.

## Mass spectroscopy analysis

HSA and OX-HSA were compared by means mass spectroscopy measurements (performed according to the protocol previously described in *Di Cara et. al Anticancer Res. 2013 Feb;33(2):489-503*).

As can be seen in Figure S7 electrophoresis measurements on HSA sample revealed a unique major band (lane **b**) corresponding to molecular weight of monomeric HSA. In OX-HSA sample a broadening of the band at this molecular weight is observed highlighting the presence of higher molecular weight components in the sample. In particular, it is possible to roughly distinguish two main lanes: **a** and **c**. The different migration behavior clearly indicates that some modification occurred in OX-HSA due to  $H_2O_2$  treatment.

Within the experimental error, molecular weight in OX-HSA sample appears to be distributed over a maximum of 2500 Da higher than HSA monomer molecular weight, this fraction is much less than 20% of the sample. MALDI spectra of samples in **a**, **b** and **c** were performed and peptide mass fingerprinting was compared to the theoretical masses from the Swiss-Prot or U.S. National Center for Biotechnology Information (NCBI, Rockville Pike, Bethesda, MD, USA) sequence databases using Mascot (<http://www.matrixscience.com/>) The analysis of MALDI spectra of protein fraction in lane **c** (i.e. where larger modification occurred) reveals Cys and Met oxidation in 3 peptides and clearly indicates that the unique tryptophan present in the HSA polypeptide chain is not oxidized.

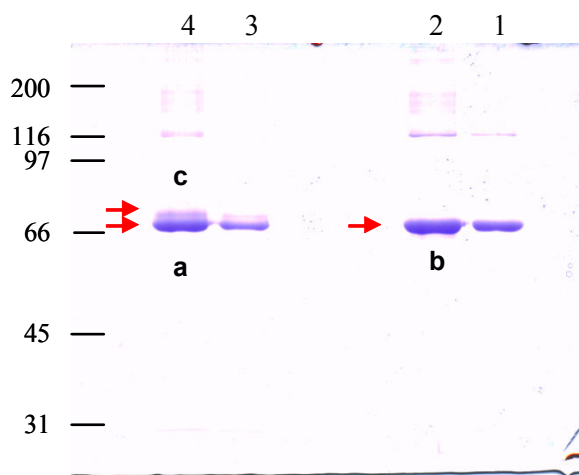

**Figure S6.** SDS-PAGE gels of HSA (1 and 2) and OX-HSA (3 and 4) samples. The molecular weight reference standard (BioRad, 31 – 200 kDa scale) are marked on the left.

| 1.                                             | ALBU HUMAN | Mass: 69321 | Score: 67 | Expect: 0.0039 | Matches: 21 |                                               |
|------------------------------------------------|------------|-------------|-----------|----------------|-------------|-----------------------------------------------|
| Serum albumin OS=Homo sapiens GN=ALB PE=1 SV=2 |            |             |           |                |             |                                               |
| Observed                                       | Mr(expt)   | Mr(calc)    | ppm       | Start          | End Miss    | Peptide                                       |
| 673.3720                                       | 672.3647   | 672.3707    | -8.93     | 237 - 242      | 0           | K.AWAVAR.L                                    |
| 695.3554                                       | 694.3481   | 694.3286    | 28.2      | 342 - 347      | 0           | K.NYAEAK.D                                    |
| 875.4234                                       | 874.4161   | 874.5025    | -98.74    | 243 - 249      | 1           | R.LSQRFK.A                                    |
| 880.4113                                       | 879.4040   | 879.4338    | -33.83    | 250 - 257      | 0           | K.AEFAEVSK.L                                  |
| 927.4882                                       | 926.4809   | 926.4861    | -5.62     | 162 - 168      | 0           | K.YLYEIAR.R                                   |
| 940.4647                                       | 939.4574   | 939.4410    | 17.5      | 131 - 138      | 0           | K.DDNPNLPR.L                                  |
| 951.4629                                       | 950.4556   | 950.4345    | 22.2      | 37 - 44        | 0           | K.DLGEENFK.A                                  |
| 960.5775                                       | 959.5702   | 959.5552    | 15.6      | 427 - 434      | 0           | K.FQNALLVR.Y                                  |
| 1000.5467                                      | 999.5394   | 999.5964    | -57.04    | 550 - 558      | 0           | K.QTALVELVK.H                                 |
| 1017.5261                                      | 1016.5188  | 1016.5291   | -10.11    | 89 - 97        | 0           | K.SLHTLFGDK.L                                 |
| 1074.5659                                      | 1073.5586  | 1073.5353   | 21.7      | 206 - 214      | 1           | K.LDELRLDEGK.A                                |
| 1149.5852                                      | 1148.5779  | 1148.5686   | 8.08      | 25 - 34        | 1           | R.DAHKSEVAHR.F                                |
| 1226.6081                                      | 1225.6008  | 1225.5979   | 2.40      | 35 - 44        | 1           | R.FKDLGEENFK.A                                |
| 1352.6693                                      | 1351.6620  | 1351.6588   | 2.39      | 497 - 508      | 1           | R.VTKCCTESLVNR.R                              |
| 1384.6692                                      | 1383.6619  | 1383.6486   | 9.60      | 497 - 508      | 1           | R.VTKCCTESLVNR.R + 2 Oxidation (C)            |
| 1467.8582                                      | 1466.8509  | 1466.8358   | 10.3      | 361 - 372      | 1           | R.RHPDYSVLLLR.L                               |
| 1639.9223                                      | 1638.9150  | 1638.9305   | -9.43     | 438 - 452      | 1           | K.KVPQVSTPLVEVSR.N                            |
| 1708.7921                                      | 1707.7848  | 1707.7307   | 31.7      | 570 - 584      | 1           | K.AVMDDFAAFVEKCK.A + 2 Oxidation (C)          |
| 1853.9049                                      | 1852.8976  | 1852.9029   | -2.86     | 509 - 524      | 0           | R.RPCFSALEVDITYVPK.E                          |
| 2045.0875                                      | 2044.0802  | 2044.0881   | -3.84     | 397 - 413      | 0           | K.VFDEFKPLVEEPQNLIK.Q                         |
| 2875.4232                                      | 2874.4159  | 2874.3350   | 28.1      | 500 - 524      | 1           | K.CCTESLVNRRPCFSALEVDITYVPK.E + Oxidation (C) |

**Figure S7.** Results of analysis of mass spectrum in bands c. Note that Methionines oxidation can not be evaluated from this result.
